# Supplementary material for: Investigation of the detoxification effect of licorice on Semen Strychni-induced acute toxicity in rats using a HPLC-Q-TOF/MS-based metabolomics approach
Source: Royal Society of Chemistry journal article supplement (doi:10.1039/d0ra08568e), 2020-01-01
Supplement: d0ra08568e1.xlsx [file d0ra08568e1.xlsx]

## Sheet: Sheet1
No.	Weight（g）	(S)Dose volume（ml）	Time	(G)Dose volume（ml）	Time	Urine volume（ml）	ALT（U/L）	AST（U/L）	AST/ALT	TP（g/L）	ALB（g/L）	GLO（g/L）	A/G	BUN（mmol/L）	CREA（μmol/L）	TG（mmol/L）	CHOL（mmol/L）	GLU（mmol/L）
K1	241.69	2.4169	08:30:00	3.62535	09:00:00	18	39.8	78.5	1.97236	51.6	22	29.6	0.74	4.53	20.1	1.23	1.76	7.06
K3	236.4	2.364	08:34:00	3.546	09:04:00	23.8	44.4	133.9	3.02	54.7	22.9	31.8	0.72	2.23	19.5	0.68	1.91	8.84
K4	233.6	2.336	08:36:00	3.504	09:06:00	23.4	41.3	101.9	2.47	56.6	24.1	32.5	0.74	4.74	16.9	0.72	2.01	8.37
K5	242.15	2.4215	08:38:00	3.63225	09:08:00	30.5	38.2	152.3	3.99	52.3	21.9	30.4	0.72	2.21	19.9	0.72	1.81	8.13
K6	239.81	2.3981	08:40:00	3.59715	09:10:00	22.1	42.6	117.2	2.75	52.3	21.9	30.4	0.72	3.63	23.9	0.5	1.79	9.12
K7	228.01	2.2801	08:42:00	3.42015	09:12:00	17.7	45.3	212.7	4.7	52.8	21.7	31.1	0.7	3.6	16.3	0.39	1.72	9.82
M2	252.25	2.5225	08:02:00	3.78375	08:32:00	27	24.1	99.1	4.11	50.1	20.6	29.5	0.7	3.34	28.5	0.34	2.21	11.39
M3	244.73	2.4473	08:04:00	3.67095	08:34:00	18.8	29.4	101.1	3.44	50	20.5	29.5	0.69	4.58	29.5	0.43	1.87	12.99
M4	253.23	2.5323	08:06:00	3.79845	08:36:00	33.6	29.5	87.2	2.96	51.1	21.4	29.7	0.72	4.47	26.2	0.61	1.81	11.35
M5	272.9	2.729	08:08:00	4.0935	08:38:00	44.9	27.8	124.9	4.49	50.1	20.9	29.2	0.72	4.99	24.1	0.73	1.96	10.48
M6	264.82	2.6482	08:10:00	3.9723	08:40:00	25.7	34.2	129.6	3.79	50	20.2	29.8	0.68	4.96	28.9	0.72	1.93	13.39
M7	269.54	2.6954	08:12:00	4.0431	08:42:00	31.3	24.5	113.6	4.64	52	21	31	0.68	6.06	26	0.57	1.76	13.42
G1	277.32	2.7732	08:42:00	4.1598	09:12:00	16.1	31	89.2	2.88	53.7	21.8	31.9	0.68	6.52	24.2	2.17	2.14	11.94
G3	271.82	2.7182	08:46:00	4.0773	09:16:00	17.5	34.7	117	3.37	49.7	19.9	29.8	0.67	7.26	27.3	1.39	1.88	11.41
G4	280.16	2.8016	08:48:00	4.2024	09:18:00	32.1	24.8	85.8	3.46	48.6	19.5	29.1	0.67	4.09	23.9	0.63	1.96	9.67
G5	275.39	2.7539	08:50:00	4.13085	09:20:00	27.3	40.2	160.1	3.98	54.5	21.8	32.7	0.67	5.86	19.2	1.39	1.57	10.18
G6	261.34	2.6134	08:52:00	3.9201	09:22:00	41.9	22.7	113	4.98	49.2	20.7	28.5	0.73	6.85	26.7	0.49	2.36	9.23
G7	266.32	2.6632	08:54:00	3.9948	09:24:00	22.4	26.5	81.7	3.08	50.5	20.6	29.9	0.69	4.67	19	2.87	1.64	9.81
KG1	248.21	2.4821	09:02:00	3.72315	09:32:00	17.2	48.1	189.9	3.95	55.7	21.8	33.9	0.64	4.6	25.4	1.42	1.9	8.19
KG3	254.18	2.5418	09:06:00	3.8127	09:36:00	23.8	27.4	153.8	5.61	55.8	22.4	33.4	0.67	5.42	23.6	0.92	1.5	9.72
KG4	232.38	2.3238	09:08:00	3.4857	09:38:00	21.3	30.9	161.8	5.24	61.4	23.8	37.6	0.63	6.58	17.1	0.46	1.78	7.01
KG5	245.76	2.4576	09:10:00	3.6864	09:40:00	15.9	46.4	166	3.58	55.2	21.3	33.9	0.63	6.72	19.8	1.58	1.69	7.68
KG6	252.28	2.5228	09:12:00	3.7842	09:42:00	33.8	34.2	96.2	2.81	58.3	22.9	35.4	0.65	5.7	21.8	0.3	1.9	9.17
KG7	238.02	2.3802	09:14:00	3.5703	09:44:00	19.6	28	262.7	9.38	55.5	21.9	33.6	0.65	3.78	25.9	1.9	1.43	14.63
